# Supplementary material
Source: MDPI journal article supplement (https://www.mdpi.com/2813-0618/1/3/9)
Supplement: s1 [file s1]

**Table S1.** Operational Definitions for Reduced Ejection Fraction Heart Failure (HFrEF) and Preserved Ejection Fraction Heart Failure (HFpEF).

| Operational Definition                                 | Role of Code            | Care Setting <sup>1</sup> | Code   | Description                                                                         | Code Category | Code Type |
|--------------------------------------------------------|-------------------------|---------------------------|--------|-------------------------------------------------------------------------------------|---------------|-----------|
| <b>Reduced Ejection Fraction Heart Failure (HFrEF)</b> |                         |                           |        |                                                                                     |               |           |
| HFrEF #1                                               | Index-defining          | Any                       | 428.1  | Left heart failure                                                                  | Diagnosis     | ICD-9-CM  |
| HFrEF #1                                               | Index-defining          | Any                       | I50.1  | Left ventricular failure, unspecified                                               | Diagnosis     | ICD-10-CM |
| HFrEF #1                                               | Exclusion on index date | Any                       | 428.2  | Systolic heart failure                                                              | Diagnosis     | ICD-9-CM  |
| HFrEF #1                                               | Exclusion on index date | Any                       | 428.20 | Unspecified systolic heart failure                                                  | Diagnosis     | ICD-9-CM  |
| HFrEF #1                                               | Exclusion on index date | Any                       | 428.21 | Acute systolic heart failure                                                        | Diagnosis     | ICD-9-CM  |
| HFrEF #1                                               | Exclusion on index date | Any                       | 428.22 | Chronic systolic heart failure                                                      | Diagnosis     | ICD-9-CM  |
| HFrEF #1                                               | Exclusion on index date | Any                       | 428.23 | Acute on chronic systolic heart failure                                             | Diagnosis     | ICD-9-CM  |
| HFrEF #1                                               | Exclusion on index date | Any                       | I50.20 | Unspecified systolic (congestive) heart failure                                     | Diagnosis     | ICD-10-CM |
| HFrEF #1                                               | Exclusion on index date | Any                       | I50.21 | Acute systolic (congestive) heart failure                                           | Diagnosis     | ICD-10-CM |
| HFrEF #1                                               | Exclusion on index date | Any                       | I50.22 | Chronic systolic (congestive) heart failure                                         | Diagnosis     | ICD-10-CM |
| HFrEF #1                                               | Exclusion on index date | Any                       | I50.23 | Acute on chronic systolic (congestive) heart failure                                | Diagnosis     | ICD-10-CM |
| HFrEF #1                                               | Exclusion on index date | Any                       | 428.3  | Diastolic heart failure                                                             | Diagnosis     | ICD-9-CM  |
| HFrEF #1                                               | Exclusion on index date | Any                       | 428.30 | Unspecified diastolic heart failure                                                 | Diagnosis     | ICD-9-CM  |
| HFrEF #1                                               | Exclusion on index date | Any                       | 428.31 | Acute diastolic heart failure                                                       | Diagnosis     | ICD-9-CM  |
| HFrEF #1                                               | Exclusion on index date | Any                       | 428.32 | Chronic diastolic heart failure                                                     | Diagnosis     | ICD-9-CM  |
| HFrEF #1                                               | Exclusion on index date | Any                       | 428.33 | Acute on chronic diastolic heart failure                                            | Diagnosis     | ICD-9-CM  |
| HFrEF #1                                               | Exclusion on index date | Any                       | I50.30 | Unspecified diastolic (congestive) heart failure                                    | Diagnosis     | ICD-10-CM |
| HFrEF #1                                               | Exclusion on index date | Any                       | I50.31 | Acute diastolic (congestive) heart failure                                          | Diagnosis     | ICD-10-CM |
| HFrEF #1                                               | Exclusion on index date | Any                       | I50.32 | Chronic diastolic (congestive) heart failure                                        | Diagnosis     | ICD-10-CM |
| HFrEF #1                                               | Exclusion on index date | Any                       | I50.33 | Acute on chronic diastolic (congestive) heart failure                               | Diagnosis     | ICD-10-CM |
| HFrEF #1                                               | Exclusion on index date | Any                       | 428.4  | Combined systolic and diastolic heart failure                                       | Diagnosis     | ICD-9-CM  |
| HFrEF #1                                               | Exclusion on index date | Any                       | 428.40 | Unspecified combined systolic and diastolic heart failure                           | Diagnosis     | ICD-9-CM  |
| HFrEF #1                                               | Exclusion on index date | Any                       | 428.41 | Acute combined systolic and diastolic heart failure                                 | Diagnosis     | ICD-9-CM  |
| HFrEF #1                                               | Exclusion on index date | Any                       | 428.42 | Chronic combined systolic and diastolic heart failure                               | Diagnosis     | ICD-9-CM  |
| HFrEF #1                                               | Exclusion on index date | Any                       | 428.43 | Acute on chronic combined systolic and diastolic heart failure                      | Diagnosis     | ICD-9-CM  |
| HFrEF #1                                               | Exclusion on index date | Any                       | I50.40 | Unspecified combined systolic (congestive) and diastolic (congestive) heart failure | Diagnosis     | ICD-10-CM |
| HFrEF #1                                               | Exclusion on index date | Any                       | I50.41 | Acute combined systolic (congestive) and diastolic (congestive) heart failure       | Diagnosis     | ICD-10-CM |

|          |                         |     |        |                                                                                          |           |           |
|----------|-------------------------|-----|--------|------------------------------------------------------------------------------------------|-----------|-----------|
| HFrEF #1 | Exclusion on index date | Any | I50.42 | Chronic combined systolic (congestive) and diastolic (congestive) heart failure          | Diagnosis | ICD-10-CM |
| HFrEF #1 | Exclusion on index date | Any | I50.43 | Acute on chronic combined systolic (congestive) and diastolic (congestive) heart failure | Diagnosis | ICD-10-CM |
| HFrEF #2 | Index-defining          | Any | 428.2  | Systolic heart failure                                                                   | Diagnosis | ICD-9-CM  |
| HFrEF #2 | Index-defining          | Any | 428.20 | Unspecified systolic heart failure                                                       | Diagnosis | ICD-9-CM  |
| HFrEF #2 | Index-defining          | Any | 428.21 | Acute systolic heart failure                                                             | Diagnosis | ICD-9-CM  |
| HFrEF #2 | Index-defining          | Any | 428.22 | Chronic systolic heart failure                                                           | Diagnosis | ICD-9-CM  |
| HFrEF #2 | Index-defining          | Any | 428.23 | Acute on chronic systolic heart failure                                                  | Diagnosis | ICD-9-CM  |
| HFrEF #2 | Index-defining          | Any | I50.20 | Unspecified systolic (congestive) heart failure                                          | Diagnosis | ICD-10-CM |
| HFrEF #2 | Index-defining          | Any | I50.21 | Acute systolic (congestive) heart failure                                                | Diagnosis | ICD-10-CM |
| HFrEF #2 | Index-defining          | Any | I50.22 | Chronic systolic (congestive) heart failure                                              | Diagnosis | ICD-10-CM |
| HFrEF #2 | Index-defining          | Any | I50.23 | Acute on chronic systolic (congestive) heart failure                                     | Diagnosis | ICD-10-CM |
| HFrEF #2 | Exclusion on index date | Any | 428.1  | Left heart failure                                                                       | Diagnosis | ICD-9-CM  |
| HFrEF #2 | Exclusion on index date | Any | I50.1  | Left ventricular failure, unspecified                                                    | Diagnosis | ICD-10-CM |
| HFrEF #2 | Exclusion on index date | Any | 428.3  | Diastolic heart failure                                                                  | Diagnosis | ICD-9-CM  |
| HFrEF #2 | Exclusion on index date | Any | 428.30 | Unspecified diastolic heart failure                                                      | Diagnosis | ICD-9-CM  |
| HFrEF #2 | Exclusion on index date | Any | 428.31 | Acute diastolic heart failure                                                            | Diagnosis | ICD-9-CM  |
| HFrEF #2 | Exclusion on index date | Any | 428.32 | Chronic diastolic heart failure                                                          | Diagnosis | ICD-9-CM  |
| HFrEF #2 | Exclusion on index date | Any | 428.33 | Acute on chronic diastolic heart failure                                                 | Diagnosis | ICD-9-CM  |
| HFrEF #2 | Exclusion on index date | Any | I50.30 | Unspecified diastolic (congestive) heart failure                                         | Diagnosis | ICD-10-CM |
| HFrEF #2 | Exclusion on index date | Any | I50.31 | Acute diastolic (congestive) heart failure                                               | Diagnosis | ICD-10-CM |
| HFrEF #2 | Exclusion on index date | Any | I50.32 | Chronic diastolic (congestive) heart failure                                             | Diagnosis | ICD-10-CM |
| HFrEF #2 | Exclusion on index date | Any | I50.33 | Acute on chronic diastolic (congestive) heart failure                                    | Diagnosis | ICD-10-CM |
| HFrEF #2 | Exclusion on index date | Any | 428.4  | Combined systolic and diastolic heart failure                                            | Diagnosis | ICD-9-CM  |
| HFrEF #2 | Exclusion on index date | Any | 428.40 | Unspecified combined systolic and diastolic heart failure                                | Diagnosis | ICD-9-CM  |
| HFrEF #2 | Exclusion on index date | Any | 428.41 | Acute combined systolic and diastolic heart failure                                      | Diagnosis | ICD-9-CM  |
| HFrEF #2 | Exclusion on index date | Any | 428.42 | Chronic combined systolic and diastolic heart failure                                    | Diagnosis | ICD-9-CM  |
| HFrEF #2 | Exclusion on index date | Any | 428.43 | Acute on chronic combined systolic and diastolic heart failure                           | Diagnosis | ICD-9-CM  |
| HFrEF #2 | Exclusion on index date | Any | I50.40 | Unspecified combined systolic (congestive) and diastolic (congestive) heart failure      | Diagnosis | ICD-10-CM |
| HFrEF #2 | Exclusion on index date | Any | I50.41 | Acute combined systolic (congestive) and diastolic (congestive) heart failure            | Diagnosis | ICD-10-CM |

|                                                          |                         |          |        |                                                                                                                                                          |           |           |
|----------------------------------------------------------|-------------------------|----------|--------|----------------------------------------------------------------------------------------------------------------------------------------------------------|-----------|-----------|
| HFrEF #2                                                 | Exclusion on index date | Any      | I50.42 | Chronic combined systolic (congestive) and diastolic (congestive) heart failure                                                                          | Diagnosis | ICD-10-CM |
| HFrEF #2                                                 | Exclusion on index date | Any      | I50.43 | Acute on chronic combined systolic (congestive) and diastolic (congestive) heart failure                                                                 | Diagnosis | ICD-10-CM |
| <b>Preserved Ejection Fraction Heart Failure (HFpEF)</b> |                         |          |        |                                                                                                                                                          |           |           |
| HFpEF #1                                                 | Index-defining          | AV OA ED | 428.3  | Diastolic heart failure                                                                                                                                  | Diagnosis | ICD-9-CM  |
| HFpEF #1                                                 | Index-defining          | AV OA ED | 428.30 | Unspecified diastolic heart failure                                                                                                                      | Diagnosis | ICD-9-CM  |
| HFpEF #1                                                 | Index-defining          | AV OA ED | 428.31 | Acute diastolic heart failure                                                                                                                            | Diagnosis | ICD-9-CM  |
| HFpEF #1                                                 | Index-defining          | AV OA ED | 428.32 | Chronic diastolic heart failure                                                                                                                          | Diagnosis | ICD-9-CM  |
| HFpEF #1                                                 | Index-defining          | AV OA ED | 428.33 | Acute on chronic diastolic heart failure                                                                                                                 | Diagnosis | ICD-9-CM  |
| HFpEF #1                                                 | Index-defining          | AV OA ED | I50.30 | Unspecified diastolic (congestive) heart failure                                                                                                         | Diagnosis | ICD-10-CM |
| HFpEF #1                                                 | Index-defining          | AV OA ED | I50.31 | Acute diastolic (congestive) heart failure                                                                                                               | Diagnosis | ICD-10-CM |
| HFpEF #1                                                 | Index-defining          | AV OA ED | I50.32 | Chronic diastolic (congestive) heart failure                                                                                                             | Diagnosis | ICD-10-CM |
| HFpEF #1                                                 | Index-defining          | AV OA ED | I50.33 | Acute on chronic diastolic (congestive) heart failure                                                                                                    | Diagnosis | ICD-10-CM |
| HFpEF #1                                                 | Index-defining          | AV OA ED | 398.91 | Rheumatic heart failure (congestive)                                                                                                                     | Diagnosis | ICD-9-CM  |
| HFpEF #1                                                 | Index-defining          | AV OA ED | I09.81 | Rheumatic heart failure                                                                                                                                  | Diagnosis | ICD-10-CM |
| HFpEF #1                                                 | Index-defining          | AV OA ED | 402    | Hypertensive heart disease                                                                                                                               | Diagnosis | ICD-9-CM  |
| HFpEF #1                                                 | Index-defining          | AV OA ED | 402.0  | Malignant hypertensive heart disease                                                                                                                     | Diagnosis | ICD-9-CM  |
| HFpEF #1                                                 | Index-defining          | AV OA ED | 402.00 | Malignant hypertensive heart disease without heart failure                                                                                               | Diagnosis | ICD-9-CM  |
| HFpEF #1                                                 | Index-defining          | AV OA ED | 402.01 | Malignant hypertensive heart disease with heart failure                                                                                                  | Diagnosis | ICD-9-CM  |
| HFpEF #1                                                 | Index-defining          | AV OA ED | 402.1  | Benign hypertensive heart disease                                                                                                                        | Diagnosis | ICD-9-CM  |
| HFpEF #1                                                 | Index-defining          | AV OA ED | 402.10 | Benign hypertensive heart disease without heart failure                                                                                                  | Diagnosis | ICD-9-CM  |
| HFpEF #1                                                 | Index-defining          | AV OA ED | 402.11 | Benign hypertensive heart disease with heart failure                                                                                                     | Diagnosis | ICD-9-CM  |
| HFpEF #1                                                 | Index-defining          | AV OA ED | 402.9  | Unspecified hypertensive heart disease                                                                                                                   | Diagnosis | ICD-9-CM  |
| HFpEF #1                                                 | Index-defining          | AV OA ED | 402.90 | Unspecified hypertensive heart disease without heart failure                                                                                             | Diagnosis | ICD-9-CM  |
| HFpEF #1                                                 | Index-defining          | AV OA ED | 402.91 | Hypertensive heart disease, unspecified, with heart failure                                                                                              | Diagnosis | ICD-9-CM  |
| HFpEF #1                                                 | Index-defining          | AV OA ED | I11.0  | Hypertensive heart disease with heart failure                                                                                                            | Diagnosis | ICD-10-CM |
| HFpEF #1                                                 | Index-defining          | AV OA ED | I11.9  | Hypertensive heart disease without heart failure                                                                                                         | Diagnosis | ICD-10-CM |
| HFpEF #1                                                 | Index-defining          | AV OA ED | 404    | Hypertensive heart and chronic kidney disease                                                                                                            | Diagnosis | ICD-9-CM  |
| HFpEF #1                                                 | Index-defining          | AV OA ED | 404.0  | Hypertensive heart and chronic kidney disease, malignant                                                                                                 | Diagnosis | ICD-9-CM  |
| HFpEF #1                                                 | Index-defining          | AV OA ED | 404.00 | Hypertensive heart and chronic kidney disease, malignant, without heart failure and with chronic kidney disease stage I through stage IV, or unspecified | Diagnosis | ICD-9-CM  |

|          |                |          |        |                                                                                                                                                            |           |          |
|----------|----------------|----------|--------|------------------------------------------------------------------------------------------------------------------------------------------------------------|-----------|----------|
| HFpEF #1 | Index-defining | AV OA ED | 404.01 | Hypertensive heart and chronic kidney disease, malignant, with heart failure and with chronic kidney disease stage I through stage IV, or unspecified      | Diagnosis | ICD-9-CM |
| HFpEF #1 | Index-defining | AV OA ED | 404.02 | Hypertensive heart and chronic kidney disease, malignant, without heart failure and with chronic kidney disease stage V or end stage renal disease         | Diagnosis | ICD-9-CM |
| HFpEF #1 | Index-defining | AV OA ED | 404.03 | Hypertensive heart and chronic kidney disease, malignant, with heart failure and with chronic kidney disease stage V or end stage renal disease            | Diagnosis | ICD-9-CM |
| HFpEF #1 | Index-defining | AV OA ED | 404.1  | Hypertensive heart and chronic kidney disease, benign                                                                                                      | Diagnosis | ICD-9-CM |
| HFpEF #1 | Index-defining | AV OA ED | 404.10 | Hypertensive heart and chronic kidney disease, benign, without heart failure and with chronic kidney disease stage I through stage IV, or unspecified      | Diagnosis | ICD-9-CM |
| HFpEF #1 | Index-defining | AV OA ED | 404.11 | Hypertensive heart and chronic kidney disease, benign, with heart failure and with chronic kidney disease stage I through stage IV, or unspecified         | Diagnosis | ICD-9-CM |
| HFpEF #1 | Index-defining | AV OA ED | 404.12 | Hypertensive heart and chronic kidney disease, benign, without heart failure and with chronic kidney disease stage V or end stage renal disease            | Diagnosis | ICD-9-CM |
| HFpEF #1 | Index-defining | AV OA ED | 404.13 | Hypertensive heart and chronic kidney disease, benign, with heart failure and chronic kidney disease stage V or end stage renal disease                    | Diagnosis | ICD-9-CM |
| HFpEF #1 | Index-defining | AV OA ED | 404.9  | Hypertensive heart and chronic kidney disease, unspecified                                                                                                 | Diagnosis | ICD-9-CM |
| HFpEF #1 | Index-defining | AV OA ED | 404.90 | Hypertensive heart and chronic kidney disease, unspecified, without heart failure and with chronic kidney disease stage I through stage IV, or unspecified | Diagnosis | ICD-9-CM |
| HFpEF #1 | Index-defining | AV OA ED | 404.91 | Hypertensive heart and chronic kidney disease, unspecified, with heart failure and with chronic kidney disease stage I through stage IV, or unspecified    | Diagnosis | ICD-9-CM |
| HFpEF #1 | Index-defining | AV OA ED | 404.92 | Hypertensive heart and chronic kidney disease, unspecified, without heart failure and with chronic kidney disease stage V or end stage renal disease       | Diagnosis | ICD-9-CM |
| HFpEF #1 | Index-defining | AV OA ED | 404.93 | Hypertensive heart and chronic kidney disease, unspecified, with heart failure and chronic kidney disease stage V or end stage renal disease               | Diagnosis | ICD-9-CM |

|          |                         |          |        |                                                                                                                                                                 |           |           |
|----------|-------------------------|----------|--------|-----------------------------------------------------------------------------------------------------------------------------------------------------------------|-----------|-----------|
| HFpEF #1 | Index-defining          | AV OA ED | I13.0  | Hypertensive heart and chronic kidney disease with heart failure and stage 1 through stage 4 chronic kidney disease, or unspecified chronic kidney disease      | Diagnosis | ICD-10-CM |
| HFpEF #1 | Index-defining          | AV OA ED | I13.10 | Hypertensive heart and chronic kidney disease without heart failure, with stage 1 through stage 4 chronic kidney disease, or unspecified chronic kidney disease | Diagnosis | ICD-10-CM |
| HFpEF #1 | Index-defining          | AV OA ED | I13.11 | Hypertensive heart and chronic kidney disease without heart failure, with stage 5 chronic kidney disease, or end stage renal disease                            | Diagnosis | ICD-10-CM |
| HFpEF #1 | Index-defining          | AV OA ED | I13.2  | Hypertensive heart and chronic kidney disease with heart failure and with stage 5 chronic kidney disease, or end stage renal disease                            | Diagnosis | ICD-10-CM |
| HFpEF #1 | Exclusion on index date | Any      | 428.1  | Left heart failure                                                                                                                                              | Diagnosis | ICD-9-CM  |
| HFpEF #1 | Exclusion on index date | Any      | I50.1  | Left ventricular failure, unspecified                                                                                                                           | Diagnosis | ICD-10-CM |
| HFpEF #1 | Exclusion on index date | Any      | 428.2  | Systolic heart failure                                                                                                                                          | Diagnosis | ICD-9-CM  |
| HFpEF #1 | Exclusion on index date | Any      | 428.20 | Unspecified systolic heart failure                                                                                                                              | Diagnosis | ICD-9-CM  |
| HFpEF #1 | Exclusion on index date | Any      | 428.21 | Acute systolic heart failure                                                                                                                                    | Diagnosis | ICD-9-CM  |
| HFpEF #1 | Exclusion on index date | Any      | 428.22 | Chronic systolic heart failure                                                                                                                                  | Diagnosis | ICD-9-CM  |
| HFpEF #1 | Exclusion on index date | Any      | 428.23 | Acute on chronic systolic heart failure                                                                                                                         | Diagnosis | ICD-9-CM  |
| HFpEF #1 | Exclusion on index date | Any      | I50.20 | Unspecified systolic (congestive) heart failure                                                                                                                 | Diagnosis | ICD-10-CM |
| HFpEF #1 | Exclusion on index date | Any      | I50.21 | Acute systolic (congestive) heart failure                                                                                                                       | Diagnosis | ICD-10-CM |
| HFpEF #1 | Exclusion on index date | Any      | I50.22 | Chronic systolic (congestive) heart failure                                                                                                                     | Diagnosis | ICD-10-CM |
| HFpEF #1 | Exclusion on index date | Any      | I50.23 | Acute on chronic systolic (congestive) heart failure                                                                                                            | Diagnosis | ICD-10-CM |
| HFpEF #1 | Exclusion on index date | Any      | 428.4  | Combined systolic and diastolic heart failure                                                                                                                   | Diagnosis | ICD-9-CM  |
| HFpEF #1 | Exclusion on index date | Any      | 428.40 | Unspecified combined systolic and diastolic heart failure                                                                                                       | Diagnosis | ICD-9-CM  |
| HFpEF #1 | Exclusion on index date | Any      | 428.41 | Acute combined systolic and diastolic heart failure                                                                                                             | Diagnosis | ICD-9-CM  |
| HFpEF #1 | Exclusion on index date | Any      | 428.42 | Chronic combined systolic and diastolic heart failure                                                                                                           | Diagnosis | ICD-9-CM  |
| HFpEF #1 | Exclusion on index date | Any      | 428.43 | Acute on chronic combined systolic and diastolic heart failure                                                                                                  | Diagnosis | ICD-9-CM  |
| HFpEF #1 | Exclusion on index date | Any      | I50.40 | Unspecified combined systolic (congestive) and diastolic (congestive) heart failure                                                                             | Diagnosis | ICD-10-CM |
| HFpEF #1 | Exclusion on index date | Any      | I50.41 | Acute combined systolic (congestive) and diastolic (congestive) heart failure                                                                                   | Diagnosis | ICD-10-CM |
| HFpEF #1 | Exclusion on index date | Any      | I50.42 | Chronic combined systolic (congestive) and diastolic (congestive) heart failure                                                                                 | Diagnosis | ICD-10-CM |

|          |                         |         |        |                                                                                                                                                          |           |           |
|----------|-------------------------|---------|--------|----------------------------------------------------------------------------------------------------------------------------------------------------------|-----------|-----------|
| HFpEF #1 | Exclusion on index date | Any     | I50.43 | Acute on chronic combined systolic (congestive) and diastolic (congestive) heart failure                                                                 | Diagnosis | ICD-10-CM |
| HFpEF #2 | Index-defining          | IP* IS* | 428.3  | Diastolic heart failure                                                                                                                                  | Diagnosis | ICD-9-CM  |
| HFpEF #2 | Index-defining          | IP* IS* | 428.30 | Unspecified diastolic heart failure                                                                                                                      | Diagnosis | ICD-9-CM  |
| HFpEF #2 | Index-defining          | IP* IS* | 428.31 | Acute diastolic heart failure                                                                                                                            | Diagnosis | ICD-9-CM  |
| HFpEF #2 | Index-defining          | IP* IS* | 428.32 | Chronic diastolic heart failure                                                                                                                          | Diagnosis | ICD-9-CM  |
| HFpEF #2 | Index-defining          | IP* IS* | 428.33 | Acute on chronic diastolic heart failure                                                                                                                 | Diagnosis | ICD-9-CM  |
| HFpEF #2 | Index-defining          | IP* IS* | I50.30 | Unspecified diastolic (congestive) heart failure                                                                                                         | Diagnosis | ICD-10-CM |
| HFpEF #2 | Index-defining          | IP* IS* | I50.31 | Acute diastolic (congestive) heart failure                                                                                                               | Diagnosis | ICD-10-CM |
| HFpEF #2 | Index-defining          | IP* IS* | I50.32 | Chronic diastolic (congestive) heart failure                                                                                                             | Diagnosis | ICD-10-CM |
| HFpEF #2 | Index-defining          | IP* IS* | I50.33 | Acute on chronic diastolic (congestive) heart failure                                                                                                    | Diagnosis | ICD-10-CM |
| HFpEF #2 | Index-defining          | IP* IS* | 398.91 | Rheumatic heart failure (congestive)                                                                                                                     | Diagnosis | ICD-9-CM  |
| HFpEF #2 | Index-defining          | IP* IS* | I09.81 | Rheumatic heart failure                                                                                                                                  | Diagnosis | ICD-10-CM |
| HFpEF #2 | Index-defining          | IP* IS* | 402    | Hypertensive heart disease                                                                                                                               | Diagnosis | ICD-9-CM  |
| HFpEF #2 | Index-defining          | IP* IS* | 402.0  | Malignant hypertensive heart disease                                                                                                                     | Diagnosis | ICD-9-CM  |
| HFpEF #2 | Index-defining          | IP* IS* | 402.00 | Malignant hypertensive heart disease without heart failure                                                                                               | Diagnosis | ICD-9-CM  |
| HFpEF #2 | Index-defining          | IP* IS* | 402.01 | Malignant hypertensive heart disease with heart failure                                                                                                  | Diagnosis | ICD-9-CM  |
| HFpEF #2 | Index-defining          | IP* IS* | 402.1  | Benign hypertensive heart disease                                                                                                                        | Diagnosis | ICD-9-CM  |
| HFpEF #2 | Index-defining          | IP* IS* | 402.10 | Benign hypertensive heart disease without heart failure                                                                                                  | Diagnosis | ICD-9-CM  |
| HFpEF #2 | Index-defining          | IP* IS* | 402.11 | Benign hypertensive heart disease with heart failure                                                                                                     | Diagnosis | ICD-9-CM  |
| HFpEF #2 | Index-defining          | IP* IS* | 402.9  | Unspecified hypertensive heart disease                                                                                                                   | Diagnosis | ICD-9-CM  |
| HFpEF #2 | Index-defining          | IP* IS* | 402.90 | Unspecified hypertensive heart disease without heart failure                                                                                             | Diagnosis | ICD-9-CM  |
| HFpEF #2 | Index-defining          | IP* IS* | 402.91 | Hypertensive heart disease, unspecified, with heart failure                                                                                              | Diagnosis | ICD-9-CM  |
| HFpEF #2 | Index-defining          | IP* IS* | I11.0  | Hypertensive heart disease with heart failure                                                                                                            | Diagnosis | ICD-10-CM |
| HFpEF #2 | Index-defining          | IP* IS* | I11.9  | Hypertensive heart disease without heart failure                                                                                                         | Diagnosis | ICD-10-CM |
| HFpEF #2 | Index-defining          | IP* IS* | 404    | Hypertensive heart and chronic kidney disease                                                                                                            | Diagnosis | ICD-9-CM  |
| HFpEF #2 | Index-defining          | IP* IS* | 404.0  | Hypertensive heart and chronic kidney disease, malignant                                                                                                 | Diagnosis | ICD-9-CM  |
| HFpEF #2 | Index-defining          | IP* IS* | 404.00 | Hypertensive heart and chronic kidney disease, malignant, without heart failure and with chronic kidney disease stage I through stage IV, or unspecified | Diagnosis | ICD-9-CM  |
| HFpEF #2 | Index-defining          | IP* IS* | 404.01 | Hypertensive heart and chronic kidney disease, malignant, with heart failure and with chronic kidney disease stage I through stage IV, or unspecified    | Diagnosis | ICD-9-CM  |

|          |                |         |        |                                                                                                                                                            |           |           |
|----------|----------------|---------|--------|------------------------------------------------------------------------------------------------------------------------------------------------------------|-----------|-----------|
| HFpEF #2 | Index-defining | IP* IS* | 404.02 | Hypertensive heart and chronic kidney disease, malignant, without heart failure and with chronic kidney disease stage V or end stage renal disease         | Diagnosis | ICD-9-CM  |
| HFpEF #2 | Index-defining | IP* IS* | 404.03 | Hypertensive heart and chronic kidney disease, malignant, with heart failure and with chronic kidney disease stage V or end stage renal disease            | Diagnosis | ICD-9-CM  |
| HFpEF #2 | Index-defining | IP* IS* | 404.1  | Hypertensive heart and chronic kidney disease, benign                                                                                                      | Diagnosis | ICD-9-CM  |
| HFpEF #2 | Index-defining | IP* IS* | 404.10 | Hypertensive heart and chronic kidney disease, benign, without heart failure and with chronic kidney disease stage I through stage IV, or unspecified      | Diagnosis | ICD-9-CM  |
| HFpEF #2 | Index-defining | IP* IS* | 404.11 | Hypertensive heart and chronic kidney disease, benign, with heart failure and with chronic kidney disease stage I through stage IV, or unspecified         | Diagnosis | ICD-9-CM  |
| HFpEF #2 | Index-defining | IP* IS* | 404.12 | Hypertensive heart and chronic kidney disease, benign, without heart failure and with chronic kidney disease stage V or end stage renal disease            | Diagnosis | ICD-9-CM  |
| HFpEF #2 | Index-defining | IP* IS* | 404.13 | Hypertensive heart and chronic kidney disease, benign, with heart failure and chronic kidney disease stage V or end stage renal disease                    | Diagnosis | ICD-9-CM  |
| HFpEF #2 | Index-defining | IP* IS* | 404.9  | Hypertensive heart and chronic kidney disease, unspecified                                                                                                 | Diagnosis | ICD-9-CM  |
| HFpEF #2 | Index-defining | IP* IS* | 404.90 | Hypertensive heart and chronic kidney disease, unspecified, without heart failure and with chronic kidney disease stage I through stage IV, or unspecified | Diagnosis | ICD-9-CM  |
| HFpEF #2 | Index-defining | IP* IS* | 404.91 | Hypertensive heart and chronic kidney disease, unspecified, with heart failure and with chronic kidney disease stage I through stage IV, or unspecified    | Diagnosis | ICD-9-CM  |
| HFpEF #2 | Index-defining | IP* IS* | 404.92 | Hypertensive heart and chronic kidney disease, unspecified, without heart failure and with chronic kidney disease stage V or end stage renal disease       | Diagnosis | ICD-9-CM  |
| HFpEF #2 | Index-defining | IP* IS* | 404.93 | Hypertensive heart and chronic kidney disease, unspecified, with heart failure and chronic kidney disease stage V or end stage renal disease               | Diagnosis | ICD-9-CM  |
| HFpEF #2 | Index-defining | IP* IS* | I13.0  | Hypertensive heart and chronic kidney disease with heart failure and stage 1 through stage 4 chronic kidney disease, or unspecified chronic kidney disease | Diagnosis | ICD-10-CM |

|          |                         |         |        |                                                                                                                                                                 |           |           |
|----------|-------------------------|---------|--------|-----------------------------------------------------------------------------------------------------------------------------------------------------------------|-----------|-----------|
| HFpEF #2 | Index-defining          | IP* IS* | I13.10 | Hypertensive heart and chronic kidney disease without heart failure, with stage 1 through stage 4 chronic kidney disease, or unspecified chronic kidney disease | Diagnosis | ICD-10-CM |
| HFpEF #2 | Index-defining          | IP* IS* | I13.11 | Hypertensive heart and chronic kidney disease without heart failure, with stage 5 chronic kidney disease, or end stage renal disease                            | Diagnosis | ICD-10-CM |
| HFpEF #2 | Index-defining          | IP* IS* | I13.2  | Hypertensive heart and chronic kidney disease with heart failure and with stage 5 chronic kidney disease, or end stage renal disease                            | Diagnosis | ICD-10-CM |
| HFpEF #2 | Exclusion on index date | Any     | 428.1  | Left heart failure                                                                                                                                              | Diagnosis | ICD-9-CM  |
| HFpEF #2 | Exclusion on index date | Any     | I50.1  | Left ventricular failure, unspecified                                                                                                                           | Diagnosis | ICD-10-CM |
| HFpEF #2 | Exclusion on index date | Any     | 428.2  | Systolic heart failure                                                                                                                                          | Diagnosis | ICD-9-CM  |
| HFpEF #2 | Exclusion on index date | Any     | 428.20 | Unspecified systolic heart failure                                                                                                                              | Diagnosis | ICD-9-CM  |
| HFpEF #2 | Exclusion on index date | Any     | 428.21 | Acute systolic heart failure                                                                                                                                    | Diagnosis | ICD-9-CM  |
| HFpEF #2 | Exclusion on index date | Any     | 428.22 | Chronic systolic heart failure                                                                                                                                  | Diagnosis | ICD-9-CM  |
| HFpEF #2 | Exclusion on index date | Any     | 428.23 | Acute on chronic systolic heart failure                                                                                                                         | Diagnosis | ICD-9-CM  |
| HFpEF #2 | Exclusion on index date | Any     | I50.20 | Unspecified systolic (congestive) heart failure                                                                                                                 | Diagnosis | ICD-10-CM |
| HFpEF #2 | Exclusion on index date | Any     | I50.21 | Acute systolic (congestive) heart failure                                                                                                                       | Diagnosis | ICD-10-CM |
| HFpEF #2 | Exclusion on index date | Any     | I50.22 | Chronic systolic (congestive) heart failure                                                                                                                     | Diagnosis | ICD-10-CM |
| HFpEF #2 | Exclusion on index date | Any     | I50.23 | Acute on chronic systolic (congestive) heart failure                                                                                                            | Diagnosis | ICD-10-CM |
| HFpEF #2 | Exclusion on index date | Any     | 428.4  | Combined systolic and diastolic heart failure                                                                                                                   | Diagnosis | ICD-9-CM  |
| HFpEF #2 | Exclusion on index date | Any     | 428.40 | Unspecified combined systolic and diastolic heart failure                                                                                                       | Diagnosis | ICD-9-CM  |
| HFpEF #2 | Exclusion on index date | Any     | 428.41 | Acute combined systolic and diastolic heart failure                                                                                                             | Diagnosis | ICD-9-CM  |
| HFpEF #2 | Exclusion on index date | Any     | 428.42 | Chronic combined systolic and diastolic heart failure                                                                                                           | Diagnosis | ICD-9-CM  |
| HFpEF #2 | Exclusion on index date | Any     | 428.43 | Acute on chronic combined systolic and diastolic heart failure                                                                                                  | Diagnosis | ICD-9-CM  |
| HFpEF #2 | Exclusion on index date | Any     | I50.40 | Unspecified combined systolic (congestive) and diastolic (congestive) heart failure                                                                             | Diagnosis | ICD-10-CM |
| HFpEF #2 | Exclusion on index date | Any     | I50.41 | Acute combined systolic (congestive) and diastolic (congestive) heart failure                                                                                   | Diagnosis | ICD-10-CM |
| HFpEF #2 | Exclusion on index date | Any     | I50.42 | Chronic combined systolic (congestive) and diastolic (congestive) heart failure                                                                                 | Diagnosis | ICD-10-CM |
| HFpEF #2 | Exclusion on index date | Any     | I50.43 | Acute on chronic combined systolic (congestive) and diastolic (congestive) heart failure                                                                        | Diagnosis | ICD-10-CM |
| HFpEF #2 | Exclusion (-183, -1)    | IPP ISP | 428    | Heart failure                                                                                                                                                   | Diagnosis | ICD-9-CM  |
| HFpEF #2 | Exclusion (-183, -1)    | IPP ISP | 428.0  | Congestive heart failure, unspecified                                                                                                                           | Diagnosis | ICD-9-CM  |



|          |                      |         |        |                                                                                     |           |           |
|----------|----------------------|---------|--------|-------------------------------------------------------------------------------------|-----------|-----------|
| HFpEF #2 | Exclusion (-183, -1) | IPP ISP | 428.1  | Left heart failure                                                                  | Diagnosis | ICD-9-CM  |
| HFpEF #2 | Exclusion (-183, -1) | IPP ISP | 428.2  | Systolic heart failure                                                              | Diagnosis | ICD-9-CM  |
| HFpEF #2 | Exclusion (-183, -1) | IPP ISP | 428.20 | Unspecified systolic heart failure                                                  | Diagnosis | ICD-9-CM  |
| HFpEF #2 | Exclusion (-183, -1) | IPP ISP | 428.21 | Acute systolic heart failure                                                        | Diagnosis | ICD-9-CM  |
| HFpEF #2 | Exclusion (-183, -1) | IPP ISP | 428.22 | Chronic systolic heart failure                                                      | Diagnosis | ICD-9-CM  |
| HFpEF #2 | Exclusion (-183, -1) | IPP ISP | 428.23 | Acute on chronic systolic heart failure                                             | Diagnosis | ICD-9-CM  |
| HFpEF #2 | Exclusion (-183, -1) | IPP ISP | 428.3  | Diastolic heart failure                                                             | Diagnosis | ICD-9-CM  |
| HFpEF #2 | Exclusion (-183, -1) | IPP ISP | 428.30 | Unspecified diastolic heart failure                                                 | Diagnosis | ICD-9-CM  |
| HFpEF #2 | Exclusion (-183, -1) | IPP ISP | 428.31 | Acute diastolic heart failure                                                       | Diagnosis | ICD-9-CM  |
| HFpEF #2 | Exclusion (-183, -1) | IPP ISP | 428.32 | Chronic diastolic heart failure                                                     | Diagnosis | ICD-9-CM  |
| HFpEF #2 | Exclusion (-183, -1) | IPP ISP | 428.33 | Acute on chronic diastolic heart failure                                            | Diagnosis | ICD-9-CM  |
| HFpEF #2 | Exclusion (-183, -1) | IPP ISP | 428.4  | Combined systolic and diastolic heart failure                                       | Diagnosis | ICD-9-CM  |
| HFpEF #2 | Exclusion (-183, -1) | IPP ISP | 428.40 | Unspecified combined systolic and diastolic heart failure                           | Diagnosis | ICD-9-CM  |
| HFpEF #2 | Exclusion (-183, -1) | IPP ISP | 428.41 | Acute combined systolic and diastolic heart failure                                 | Diagnosis | ICD-9-CM  |
| HFpEF #2 | Exclusion (-183, -1) | IPP ISP | 428.42 | Chronic combined systolic and diastolic heart failure                               | Diagnosis | ICD-9-CM  |
| HFpEF #2 | Exclusion (-183, -1) | IPP ISP | 428.43 | Acute on chronic combined systolic and diastolic heart failure                      | Diagnosis | ICD-9-CM  |
| HFpEF #2 | Exclusion (-183, -1) | IPP ISP | 428.9  | Unspecified heart failure                                                           | Diagnosis | ICD-9-CM  |
| HFpEF #2 | Exclusion (-183, -1) | IPP ISP | I50.1  | Left ventricular failure, unspecified                                               | Diagnosis | ICD-10-CM |
| HFpEF #2 | Exclusion (-183, -1) | IPP ISP | I50.20 | Unspecified systolic (congestive) heart failure                                     | Diagnosis | ICD-10-CM |
| HFpEF #2 | Exclusion (-183, -1) | IPP ISP | I50.21 | Acute systolic (congestive) heart failure                                           | Diagnosis | ICD-10-CM |
| HFpEF #2 | Exclusion (-183, -1) | IPP ISP | I50.22 | Chronic systolic (congestive) heart failure                                         | Diagnosis | ICD-10-CM |
| HFpEF #2 | Exclusion (-183, -1) | IPP ISP | I50.23 | Acute on chronic systolic (congestive) heart failure                                | Diagnosis | ICD-10-CM |
| HFpEF #2 | Exclusion (-183, -1) | IPP ISP | I50.30 | Unspecified diastolic (congestive) heart failure                                    | Diagnosis | ICD-10-CM |
| HFpEF #2 | Exclusion (-183, -1) | IPP ISP | I50.31 | Acute diastolic (congestive) heart failure                                          | Diagnosis | ICD-10-CM |
| HFpEF #2 | Exclusion (-183, -1) | IPP ISP | I50.32 | Chronic diastolic (congestive) heart failure                                        | Diagnosis | ICD-10-CM |
| HFpEF #2 | Exclusion (-183, -1) | IPP ISP | I50.33 | Acute on chronic diastolic (congestive) heart failure                               | Diagnosis | ICD-10-CM |
| HFpEF #2 | Exclusion (-183, -1) | IPP ISP | I50.40 | Unspecified combined systolic (congestive) and diastolic (congestive) heart failure | Diagnosis | ICD-10-CM |
| HFpEF #2 | Exclusion (-183, -1) | IPP ISP | I50.41 | Acute combined systolic (congestive) and diastolic (congestive) heart failure       | Diagnosis | ICD-10-CM |
| HFpEF #2 | Exclusion (-183, -1) | IPP ISP | I50.42 | Chronic combined systolic (congestive) and diastolic (congestive) heart failure     | Diagnosis | ICD-10-CM |

|          |                      |         |         |                                                                                                                                                          |           |           |
|----------|----------------------|---------|---------|----------------------------------------------------------------------------------------------------------------------------------------------------------|-----------|-----------|
| HFpEF #2 | Exclusion (-183, -1) | IPP ISP | I50.43  | Acute on chronic combined systolic (congestive) and diastolic (congestive) heart failure                                                                 | Diagnosis | ICD-10-CM |
| HFpEF #2 | Exclusion (-183, -1) | IPP ISP | I50.810 | Right heart failure, unspecified                                                                                                                         | Diagnosis | ICD-10-CM |
| HFpEF #2 | Exclusion (-183, -1) | IPP ISP | I50.811 | Acute right heart failure                                                                                                                                | Diagnosis | ICD-10-CM |
| HFpEF #2 | Exclusion (-183, -1) | IPP ISP | I50.812 | Chronic right heart failure                                                                                                                              | Diagnosis | ICD-10-CM |
| HFpEF #2 | Exclusion (-183, -1) | IPP ISP | I50.813 | Acute on chronic right heart failure                                                                                                                     | Diagnosis | ICD-10-CM |
| HFpEF #2 | Exclusion (-183, -1) | IPP ISP | I50.814 | Right heart failure due to left heart failure                                                                                                            | Diagnosis | ICD-10-CM |
| HFpEF #2 | Exclusion (-183, -1) | IPP ISP | I50.82  | Biventricular heart failure                                                                                                                              | Diagnosis | ICD-10-CM |
| HFpEF #2 | Exclusion (-183, -1) | IPP ISP | I50.83  | High output heart failure                                                                                                                                | Diagnosis | ICD-10-CM |
| HFpEF #2 | Exclusion (-183, -1) | IPP ISP | I50.84  | End stage heart failure                                                                                                                                  | Diagnosis | ICD-10-CM |
| HFpEF #2 | Exclusion (-183, -1) | IPP ISP | I50.89  | Other heart failure                                                                                                                                      | Diagnosis | ICD-10-CM |
| HFpEF #2 | Exclusion (-183, -1) | IPP ISP | I50.9   | Heart failure, unspecified                                                                                                                               | Diagnosis | ICD-10-CM |
| HFpEF #2 | Exclusion (-183, -1) | IPP ISP | 398.91  | Rheumatic heart failure (congestive)                                                                                                                     | Diagnosis | ICD-9-CM  |
| HFpEF #2 | Exclusion (-183, -1) | IPP ISP | I09.81  | Rheumatic heart failure                                                                                                                                  | Diagnosis | ICD-10-CM |
| HFpEF #2 | Exclusion (-183, -1) | IPP ISP | 402     | Hypertensive heart disease                                                                                                                               | Diagnosis | ICD-9-CM  |
| HFpEF #2 | Exclusion (-183, -1) | IPP ISP | 402.0   | Malignant hypertensive heart disease                                                                                                                     | Diagnosis | ICD-9-CM  |
| HFpEF #2 | Exclusion (-183, -1) | IPP ISP | 402.00  | Malignant hypertensive heart disease without heart failure                                                                                               | Diagnosis | ICD-9-CM  |
| HFpEF #2 | Exclusion (-183, -1) | IPP ISP | 402.01  | Malignant hypertensive heart disease with heart failure                                                                                                  | Diagnosis | ICD-9-CM  |
| HFpEF #2 | Exclusion (-183, -1) | IPP ISP | 402.1   | Benign hypertensive heart disease                                                                                                                        | Diagnosis | ICD-9-CM  |
| HFpEF #2 | Exclusion (-183, -1) | IPP ISP | 402.10  | Benign hypertensive heart disease without heart failure                                                                                                  | Diagnosis | ICD-9-CM  |
| HFpEF #2 | Exclusion (-183, -1) | IPP ISP | 402.11  | Benign hypertensive heart disease with heart failure                                                                                                     | Diagnosis | ICD-9-CM  |
| HFpEF #2 | Exclusion (-183, -1) | IPP ISP | 402.9   | Unspecified hypertensive heart disease                                                                                                                   | Diagnosis | ICD-9-CM  |
| HFpEF #2 | Exclusion (-183, -1) | IPP ISP | 402.90  | Unspecified hypertensive heart disease without heart failure                                                                                             | Diagnosis | ICD-9-CM  |
| HFpEF #2 | Exclusion (-183, -1) | IPP ISP | 402.91  | Hypertensive heart disease, unspecified, with heart failure                                                                                              | Diagnosis | ICD-9-CM  |
| HFpEF #2 | Exclusion (-183, -1) | IPP ISP | I11.0   | Hypertensive heart disease with heart failure                                                                                                            | Diagnosis | ICD-10-CM |
| HFpEF #2 | Exclusion (-183, -1) | IPP ISP | I11.9   | Hypertensive heart disease without heart failure                                                                                                         | Diagnosis | ICD-10-CM |
| HFpEF #2 | Exclusion (-183, -1) | IPP ISP | 404     | Hypertensive heart and chronic kidney disease                                                                                                            | Diagnosis | ICD-9-CM  |
| HFpEF #2 | Exclusion (-183, -1) | IPP ISP | 404.0   | Hypertensive heart and chronic kidney disease, malignant                                                                                                 | Diagnosis | ICD-9-CM  |
| HFpEF #2 | Exclusion (-183, -1) | IPP ISP | 404.00  | Hypertensive heart and chronic kidney disease, malignant, without heart failure and with chronic kidney disease stage I through stage IV, or unspecified | Diagnosis | ICD-9-CM  |

|          |                      |         |        |                                                                                                                                                            |           |          |
|----------|----------------------|---------|--------|------------------------------------------------------------------------------------------------------------------------------------------------------------|-----------|----------|
| HFpEF #2 | Exclusion (-183, -1) | IPP ISP | 404.01 | Hypertensive heart and chronic kidney disease, malignant, with heart failure and with chronic kidney disease stage I through stage IV, or unspecified      | Diagnosis | ICD-9-CM |
| HFpEF #2 | Exclusion (-183, -1) | IPP ISP | 404.02 | Hypertensive heart and chronic kidney disease, malignant, without heart failure and with chronic kidney disease stage V or end stage renal disease         | Diagnosis | ICD-9-CM |
| HFpEF #2 | Exclusion (-183, -1) | IPP ISP | 404.03 | Hypertensive heart and chronic kidney disease, malignant, with heart failure and with chronic kidney disease stage V or end stage renal disease            | Diagnosis | ICD-9-CM |
| HFpEF #2 | Exclusion (-183, -1) | IPP ISP | 404.1  | Hypertensive heart and chronic kidney disease, benign                                                                                                      | Diagnosis | ICD-9-CM |
| HFpEF #2 | Exclusion (-183, -1) | IPP ISP | 404.10 | Hypertensive heart and chronic kidney disease, benign, without heart failure and with chronic kidney disease stage I through stage IV, or unspecified      | Diagnosis | ICD-9-CM |
| HFpEF #2 | Exclusion (-183, -1) | IPP ISP | 404.11 | Hypertensive heart and chronic kidney disease, benign, with heart failure and with chronic kidney disease stage I through stage IV, or unspecified         | Diagnosis | ICD-9-CM |
| HFpEF #2 | Exclusion (-183, -1) | IPP ISP | 404.12 | Hypertensive heart and chronic kidney disease, benign, without heart failure and with chronic kidney disease stage V or end stage renal disease            | Diagnosis | ICD-9-CM |
| HFpEF #2 | Exclusion (-183, -1) | IPP ISP | 404.13 | Hypertensive heart and chronic kidney disease, benign, with heart failure and chronic kidney disease stage V or end stage renal disease                    | Diagnosis | ICD-9-CM |
| HFpEF #2 | Exclusion (-183, -1) | IPP ISP | 404.9  | Hypertensive heart and chronic kidney disease, unspecified                                                                                                 | Diagnosis | ICD-9-CM |
| HFpEF #2 | Exclusion (-183, -1) | IPP ISP | 404.90 | Hypertensive heart and chronic kidney disease, unspecified, without heart failure and with chronic kidney disease stage I through stage IV, or unspecified | Diagnosis | ICD-9-CM |
| HFpEF #2 | Exclusion (-183, -1) | IPP ISP | 404.91 | Hypertensive heart and chronic kidney disease, unspecified, with heart failure and with chronic kidney disease stage I through stage IV, or unspecified    | Diagnosis | ICD-9-CM |
| HFpEF #2 | Exclusion (-183, -1) | IPP ISP | 404.92 | Hypertensive heart and chronic kidney disease, unspecified, without heart failure and with chronic kidney disease stage V or end stage renal disease       | Diagnosis | ICD-9-CM |
| HFpEF #2 | Exclusion (-183, -1) | IPP ISP | 404.93 | Hypertensive heart and chronic kidney disease, unspecified, with heart failure and chronic kidney disease stage V or end stage renal disease               | Diagnosis | ICD-9-CM |

|          |                      |         |        |                                                                                                                                                                 |           |           |
|----------|----------------------|---------|--------|-----------------------------------------------------------------------------------------------------------------------------------------------------------------|-----------|-----------|
| HFpEF #2 | Exclusion (-183, -1) | IPP ISP | I13.0  | Hypertensive heart and chronic kidney disease with heart failure and stage 1 through stage 4 chronic kidney disease, or unspecified chronic kidney disease      | Diagnosis | ICD-10-CM |
| HFpEF #2 | Exclusion (-183, -1) | IPP ISP | I13.10 | Hypertensive heart and chronic kidney disease without heart failure, with stage 1 through stage 4 chronic kidney disease, or unspecified chronic kidney disease | Diagnosis | ICD-10-CM |
| HFpEF #2 | Exclusion (-183, -1) | IPP ISP | I13.11 | Hypertensive heart and chronic kidney disease without heart failure, with stage 5 chronic kidney disease, or end stage renal disease                            | Diagnosis | ICD-10-CM |
| HFpEF #2 | Exclusion (-183, -1) | IPP ISP | I13.2  | Hypertensive heart and chronic kidney disease with heart failure and with stage 5 chronic kidney disease, or end stage renal disease                            | Diagnosis | ICD-10-CM |

<sup>1</sup>Care setting definitions per the Sentinel Common Data Model: AV OA ED = Ambulatory visit, other ambulatory visit, or emergency department encounter; IP\* IS\* = Inpatient hospital stay or non-acute institutional stay, any diagnostic position; IPP or ISP = Inpatient hospital stay or non-acute institutional stay, primary diagnostic position.

**Table S2.** Demographic and Clinical Characteristics of HFrEF and HFpEF Patients (and HFpEF patients with no MI during the baseline period) in the Sentinel Distributed Database in the ICD-9 Era (1 July 2010—30 September 2015) and the ICD-10 Era (1 April 2016—30 September 2018).

|                                                   | HFrEF (ICD-9 era) | HFrEF (ICD-10 era) | HFpEF (ICD-9 era), not excluding MI at baseline | HFpEF (ICD-10 era), not excluding MI at baseline | HFpEF (ICD-9 era), excluding MI at baseline | HFpEF (ICD-10 era), excluding MI at baseline |
|---------------------------------------------------|-------------------|--------------------|-------------------------------------------------|--------------------------------------------------|---------------------------------------------|----------------------------------------------|
| Number of unique patients                         | 1,157,558         | 998,619            | 5,693,622                                       | 4,773,384                                        | 5,569,822                                   | 4,646,229                                    |
| <b>Demographics</b>                               |                   |                    |                                                 |                                                  |                                             |                                              |
| Mean Age                                          | 73.8±12.3         | 73.8±11.9          | 72.8±12.2                                       | 74.5±11.7                                        | 72.8±12.2                                   | 74.5±11.7                                    |
| Age: 0-17                                         | 0.0%              | 0.0%               | 0.0%                                            | 0.0%                                             | 0.1%                                        | 0.0%                                         |
| Age: 18-44                                        | 2.5%              | 2.3%               | 3.2%                                            | 2.0%                                             | 3.3%                                        | 2.0%                                         |
| Age: 45-64                                        | 17.8%             | 17.5%              | 18.7%                                           | 15.7%                                            | 18.7%                                       | 15.6%                                        |
| Age: 65+                                          | 79.7%             | 80.3%              | 78.0%                                           | 82.3%                                            | 78.0%                                       | 82.3%                                        |
| Gender (Female)                                   | 42.6%             | 40.1%              | 58.8%                                           | 56.5%                                            | 58.9%                                       | 56.7%                                        |
| Gender (Male)                                     | 57.4%             | 59.9%              | 41.2%                                           | 43.5%                                            | 41.1%                                       | 43.3%                                        |
| Race (American Indian or Alaska Native)           | 0.5%              | 0.5%               | 0.3%                                            | 0.4%                                             | 0.3%                                        | 0.4%                                         |
| Race (Asian)                                      | 1.5%              | 1.4%               | 2.5%                                            | 2.2%                                             | 2.5%                                        | 2.2%                                         |
| Race (Black or African American)                  | 14.0%             | 13.6%              | 13.1%                                           | 12.5%                                            | 13.1%                                       | 12.6%                                        |
| Race (Native Hawaiian or Other Pacific Islander)  | 0.1%              | 0.2%               | 0.1%                                            | 0.2%                                             | 0.1%                                        | 0.2%                                         |
| Race <sup>3</sup> (Unknown)                       | 12.3%             | 12.5%              | 18.6%                                           | 14.5%                                            | 18.8%                                       | 14.6%                                        |
| Race (White)                                      | 71.6%             | 71.8%              | 65.3%                                           | 70.2%                                            | 65.1%                                       | 70.1%                                        |
| Hispanic Origin                                   | 2.4%              | 2.1%               | 3.3%                                            | 2.6%                                             | 3.3%                                        | 2.6%                                         |
| <b>Recorded on heart failure index diagnosis:</b> |                   |                    |                                                 |                                                  |                                             |                                              |
| Diastolic heart failure                           |                   | --                 | 31.0%                                           | 37.6%                                            | 30.6%                                       | 37.4%                                        |
| Left heart failure                                | 16.7%             | 5.7%               | --                                              | --                                               | --                                          | --                                           |
| Systolic heart failure                            | 83.3%             | 94.3%              | --                                              | --                                               | --                                          | --                                           |
| Unspecified heart failure                         | 4.6%              | 20.3%              | 70.9%                                           | 73.4%                                            | 71.3%                                       | 73.6%                                        |
| <b>Spironolactone use in the prior 183 days:</b>  |                   |                    |                                                 |                                                  |                                             |                                              |
| Spironolactone                                    | 6.2%              | 6.7%               | 1.3%                                            | 1.8%                                             | 1.3%                                        | 1.7%                                         |

| History of cardiovascular-related medication use in the prior 183 days: |       |       |       |       |       |       |
|-------------------------------------------------------------------------|-------|-------|-------|-------|-------|-------|
| Angiotensin-converting enzyme inhibitors                                | 45.7% | 40.0% | 35.0% | 31.1% | 34.7% | 30.8% |
| Angiotensin II receptor blockers                                        | 19.5% | 23.9% | 23.2% | 25.8% | 23.3% | 25.8% |
| Antiarrhythmics                                                         | 13.4% | 14.0% | 4.7%  | 5.8%  | 4.7%  | 5.8%  |
| Beta blockers                                                           | 72.0% | 74.1% | 47.8% | 53.1% | 47.3% | 52.7% |
| Digoxin                                                                 | 14.9% | 9.8%  | 4.6%  | 3.4%  | 4.5%  | 3.4%  |
| Hydralazine                                                             | 7.5%  | 8.1%  | 3.9%  | 5.7%  | 3.8%  | 5.6%  |
| Loop diuretics                                                          | 56.0% | 55.2% | 26.9% | 32.7% | 26.7% | 32.6% |
| Mineralocorticoid receptor antagonists (eplerenone)                     | 0.8%  | 1.1%  | 0.1%  | 0.2%  | 0.1%  | 0.2%  |
| Nitrates                                                                | 22.9% | 19.4% | 10.3% | 10.8% | 9.8%  | 10.3% |
| Potassium-sparing diuretics                                             | 9.9%  | 10.3% | 5.0%  | 4.5%  | 4.9%  | 4.4%  |
| Thiazide diuretics                                                      | 16.9% | 14.5% | 27.0% | 23.0% | 27.0% | 23.1% |
| History of cardiovascular-related comorbidities in the prior 183 days:  |       |       |       |       |       |       |
| Anemia                                                                  | 46.5% | 44.1% | 30.5% | 31.9% | 29.9% | 31.2% |
| Atrial fibrillation or flutter                                          | 46.5% | 49.2% | 19.4% | 25.4% | 19.0% | 25.1% |
| Cardiomyopathy                                                          | 68.2% | 66.3% | 0.0%  | 0.0%  | 0.0%  | 0.0%  |
| Chronic obstructive pulmonary disease                                   | 37.1% | 34.7% | 21.0% | 23.6% | 20.6% | 23.2% |
| Coronary artery bypass graft                                            | 2.7%  | 2.3%  | 0.5%  | 0.5%  | 0.3%  | 0.3%  |
| Depression                                                              | 19.6% | 21.3% | 15.4% | 18.6% | 15.1% | 18.4% |
| Diabetes mellitus                                                       | 50.4% | 49.6% | 40.2% | 43.2% | 39.9% | 42.9% |
| Endocarditis                                                            | 1.9%  | 2.1%  | 0.6%  | 0.9%  | 0.6%  | 0.8%  |
| Heart transplant                                                        | 1.4%  | 0.1%  | 0.4%  | 0.0%  | 0.4%  | 0.0%  |
| Human immunodeficiency virus                                            | 0.5%  | 0.6%  | 0.4%  | 0.3%  | 0.4%  | 0.3%  |
| Hyperkalemia                                                            | 11.6% | 12.1% | 4.2%  | 5.3%  | 4.0%  | 5.0%  |
| Hyperlipidemia                                                          | 72.1% | 72.6% | 61.5% | 61.9% | 61.1% | 61.3% |
| Hypertension                                                            | 88.5% | 88.5% | 81.1% | 84.2% | 80.7% | 83.9% |
| Hypertensive nephropathy                                                | 30.9% | 35.0% | 12.3% | 18.0% | 11.8% | 17.4% |
| Hypotension                                                             | 17.8% | 17.9% | 5.5%  | 6.5%  | 5.1%  | 6.0%  |
| Implantable cardioverter defibrillator                                  | 22.7% | 27.0% | 0.0%  | 0.0%  | 0.0%  | 0.0%  |
| Ischemic stroke or transient ischemic attack                            | 24.0% | 22.1% | 15.9% | 16.3% | 15.5% | 15.8% |
| Myocardial infarction                                                   | 32.8% | 31.5% | 3.2%  | 3.9%  | 0.0%  | 0.0%  |

|                                                                                                                                                       |       |       |       |       |       |       |
|-------------------------------------------------------------------------------------------------------------------------------------------------------|-------|-------|-------|-------|-------|-------|
| Nephropathy                                                                                                                                           | 51.4% | 58.7% | 25.6% | 39.4% | 24.9% | 38.7% |
| Obesity                                                                                                                                               | 16.7% | 24.9% | 12.1% | 22.1% | 11.9% | 21.8% |
| Other dysrhythmias                                                                                                                                    | 48.8% | 47.4% | 18.5% | 20.0% | 17.7% | 19.1% |
| Psychosis                                                                                                                                             | 6.0%  | 10.8% | 4.4%  | 9.5%  | 4.3%  | 9.3%  |
| Pulmonary hypertension                                                                                                                                | 17.1% | 17.6% | 4.9%  | 6.7%  | 4.7%  | 6.4%  |
| Renal disorders                                                                                                                                       | 39.5% | 43.0% | 19.3% | 27.3% | 18.8% | 26.8% |
| Rheumatic heart disease                                                                                                                               | 15.9% | 16.0% | 4.7%  | 5.3%  | 4.4%  | 5.0%  |
| Sleep apnea                                                                                                                                           | 13.5% | 18.2% | 8.4%  | 13.3% | 8.3%  | 13.2% |
| Smoking                                                                                                                                               | 14.0% | 16.1% | 7.0%  | 9.5%  | 6.7%  | 9.2%  |
| Stable angina                                                                                                                                         | 9.7%  | 14.9% | 4.9%  | 7.4%  | 4.7%  | 6.8%  |
| Unstable angina                                                                                                                                       | 16.4% | 19.3% | 6.6%  | 8.7%  | 5.9%  | 7.9%  |
| Valve disorders                                                                                                                                       | 20.0% | 20.9% | 7.4%  | 8.8%  | 7.1%  | 8.5%  |
| <sup>1</sup> All metrics are based on total number of episodes per group, except for sex and race which are based on total number of unique patients. |       |       |       |       |       |       |
| <sup>2</sup> Value represents standard deviation where no % follows the value.                                                                        |       |       |       |       |       |       |
| <sup>3</sup> Race data may not be completely populated at all Data Partners; therefore, data about race may be incomplete.                            |       |       |       |       |       |       |
